# Supplementary material for: Signatures of Selection and Genomic Diversity of Muskellunge (Esox masquinongy) from Two Populations in North America
Source: MDPI journal article supplement (doi:10.3390/genes12071021), 2021-06-30
Supplement: s1 [file s1]

# Signatures of selection and genomic diversity of Muskellunge (*Esox masquinongy*) from two populations in North America.

Josue Chinchilla-Vargas<sup>1\*</sup>, Jonathan Meerbeek<sup>2</sup>, Max F. Rothschild<sup>1</sup>, Francesca Bertolini<sup>3</sup>.

<sup>1</sup>Iowa State University, Department of Animal Science, Ames, Iowa, 50011.

<sup>2</sup>Iowa Department of Natural Resources, Spirit Lake Fish Hatchery, Spirit Lake, Iowa, 51360.

<sup>3</sup>National Institute of Aquatic Resources, Technical University of Denmark, 2800, KGs. Lyngby, Denmark.

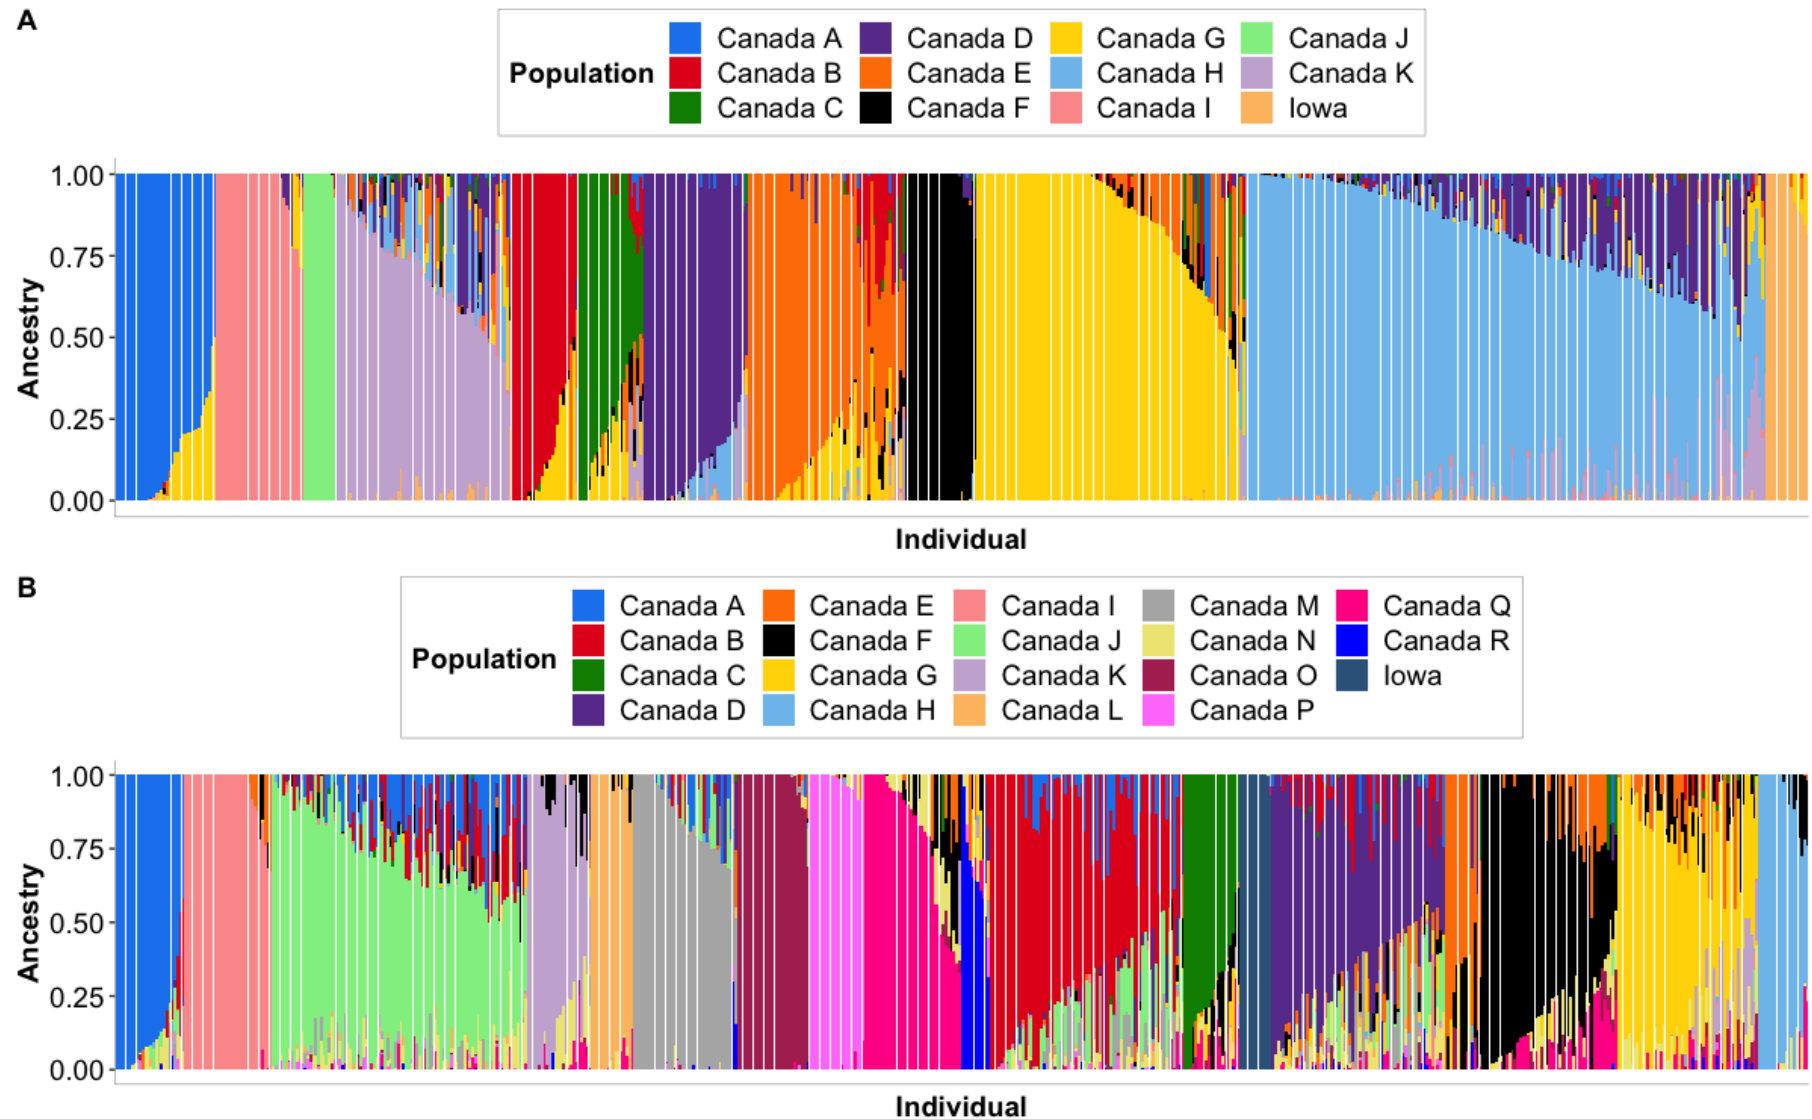

**Supplementary Figure 1. A.** Admixture analysis results for Muskellunge populations from Iowa and Canada with 12 assumed subpopulations. **B.** Admixture analysis result for Muskellunge populations from Iowa and Canada with 19 assumed subpopulations.
