# Supplementary material for: Signatures of Selection and Genomic Diversity of Muskellunge (Esox masquinongy) from Two Populations in North America
Source: MDPI journal article supplement (doi:10.3390/genes12071021), 2021-06-30
Supplement: s1 [file s1]

**Signatures of selection and genomic diversity of Muskellunge (*Esox masquinongy*) from two populations in North America.**

Josue Chinchilla-Vargas<sup>1\*</sup>, Jonathan Meerbeek<sup>2</sup>, Max F. Rothschild<sup>1</sup>, Francesca Bertolini<sup>3</sup>.

<sup>1</sup> Iowa State University, Department of Animal Science, Ames, Iowa, 50011.

<sup>2</sup> Iowa Department of Natural Resources, Spirit Lake Fish Hatchery, Spirit Lake, Iowa, 51360.

<sup>3</sup> National Institute of Aquatic Resources, Technical University of Denmark, 2800, KGs. Lyngby, Denmark.

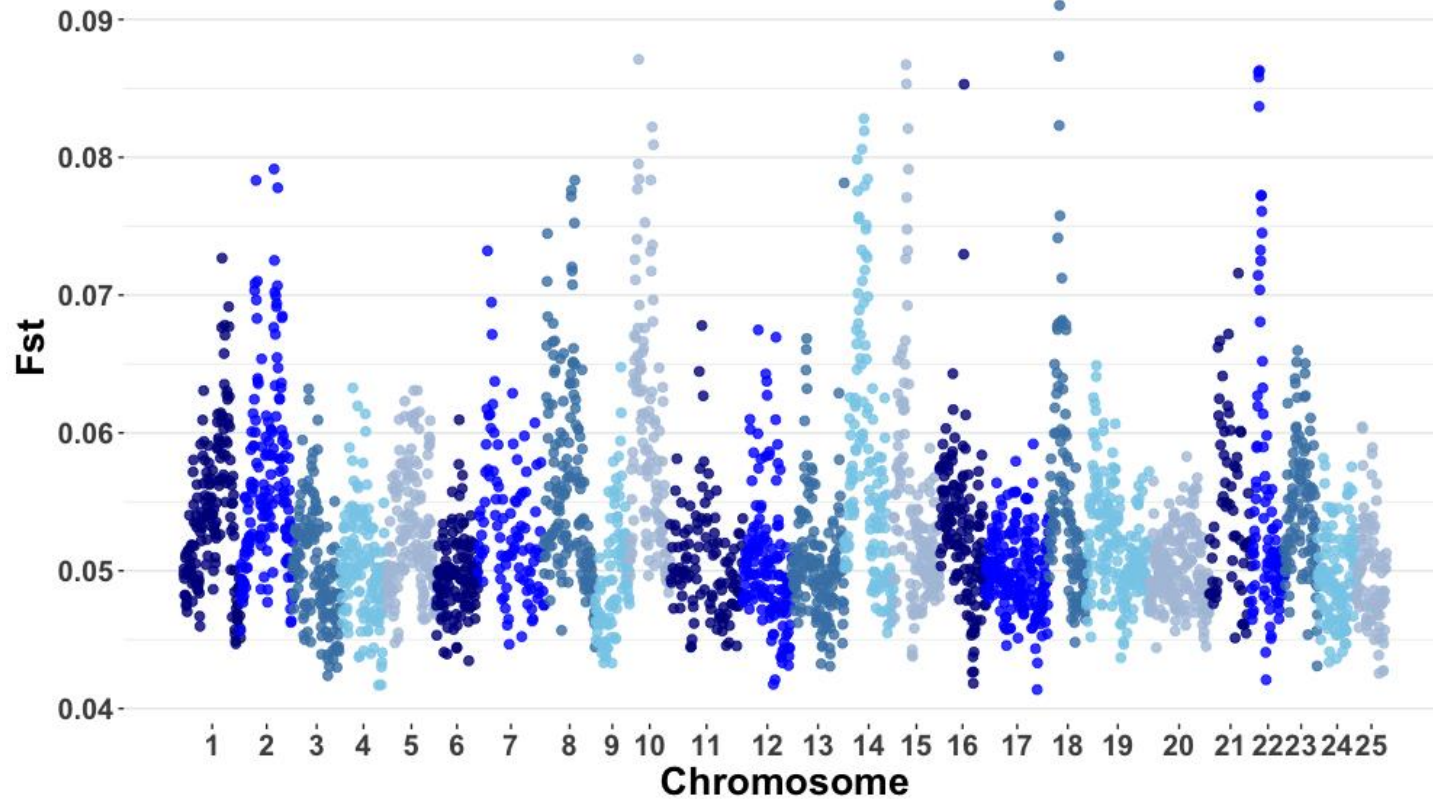

**Figure S1** Mean Fst (mFst) values for 0.5 mega base windows with a 50% overlap contrasting males and females in the Iowan population.
