# Supplementary material for: Signatures of Selection and Genomic Diversity of Muskellunge (Esox masquinongy) from Two Populations in North America
Source: Genes (Basel). 2021 Jun 30;12(7):1021. doi: 10.3390/genes12071021 (PMC8303616; doi:10.3390/genes12071021)
Supplement: Supplementary file 1 [file genes-12-01021-s001.zip]

Archive with 6 entries (6 files):
- FigureS1.pdf
- FigureS2.pdf
- Supplementary Table 1.xlsx
- Supplementary Table 2.xlsx
- Supplementary Table 3.xlsx
- Supplementary Table 4.xlsx
