# Supplementary material for: Signatures of Selection and Genomic Diversity of Muskellunge (Esox masquinongy) from Two Populations in North America
Source: Genes (Basel). 2021 Jun 30;12(7):1021. doi: 10.3390/genes12071021 (PMC8303616; doi:10.3390/genes12071021)
Supplement: Supplementary file 1 [file genes-12-01021-s001.zip › Supplementary Table 3.xlsx]

## Sheet: mart_export
	Signatures of selection and genomic diversity of Muskellunge (Esox masquinongy) from two populations in North America.
	Josue Chinchilla-Vargas1*, Jonathan Meerbeek2, Max F. Rothschild1, Francesca Bertolini3.
	1 Iowa State University, Department of Animal Science, Ames, Iowa, 50011.
	2 Iowa Department of Natural Resources, Spirit Lake Fish Hatchery, Spirit Lake, Iowa, 51360.
	3 National Institute of Aquatic Resources, Technical University of Denmark, 2800, KGs. Lyngby, Denmark
	Supplementary Table 3. Annotated genes located in windows found significant in mFst analyses.
	Gene symbol	Gene name	Chromosome	Gene start (bp)
	aasdhppt	aminoadipate-semialdehyde dehydrogenase-phosphopantetheinyl transferase [Source:ZFIN;Acc:ZDB-GENE-050913-36]	1	31410418
	msantd4	Myb/SANT DNA binding domain containing 4 with coiled-coils [Source:NCBI gene;Acc:105024078]	1	31422396
	gria4a	glutamate ionotropic receptor AMPA type subunit 4 [Source:NCBI gene;Acc:105024075]	1	31441950
	pdgfd	platelet derived growth factor d [Source:ZFIN;Acc:ZDB-GENE-071217-1]	1	31621540
	robo2	roundabout guidance receptor 2 [Source:NCBI gene;Acc:105023564]	1	30271102
	trpc2a	transient receptor potential cation channel subfamily C member 2a [Source:ZFIN;Acc:ZDB-GENE-130530-602]	1	30674159
	stim1a	stromal interaction molecule 1 [Source:NCBI gene;Acc:105023558]	1	30693269
	alkbh8	alkB homolog 8, tRNA methyltransferase [Source:NCBI gene;Acc:105024079]	1	31296563
	cwf19l2	CWF19 like cell cycle control factor 2 [Source:NCBI gene;Acc:619271]	1	31312426
	gucy1a2	guanylate cyclase 1 soluble subunit alpha 2 [Source:NCBI gene;Acc:105024076]	1	31350967
	tollip	toll interacting protein [Source:NCBI gene;Acc:336876]	2	20100750
	cmc2	C-X9-C motif containing 2 [Source:NCBI gene;Acc:105027288]	2	20734186
	cenpn	centromere protein N [Source:NCBI gene;Acc:105027286]	2	20748140
	atmin	ATM interactor [Source:NCBI gene;Acc:105027285]	2	20754012
	CIBAR2	CBY1 interacting BAR domain containing 2 [Source:NCBI gene;Acc:105027282]	2	20796768
	gse1	Gse1 coiled-coil protein [Source:NCBI gene;Acc:105027281]	2	20841858
	gins2	GINS complex subunit 2 [Source:NCBI gene;Acc:105027280]	2	21113299
	emc8	ER membrane protein complex subunit 8 [Source:NCBI gene;Acc:105027279]	2	21118980
	dusp22a	dual specificity protein phosphatase 22-A [Source:NCBI gene;Acc:105027290]	2	21126076
	irf8	interferon regulatory factor 8 [Source:ZFIN;Acc:ZDB-GENE-040718-367]	2	21172040
	foxf1	forkhead box F1 [Source:NCBI gene;Acc:105015863]	2	21334976
	mthfsd	methenyltetrahydrofolate synthetase domain containing [Source:NCBI gene;Acc:105015873]	2	21342978
	gas8	growth arrest specific 8 [Source:NCBI gene;Acc:105015885]	2	21356895
	def8	differentially expressed in FDCP 8 homolog [Source:NCBI gene;Acc:105015917]	2	21424818
	mc1r	melanocortin 1 receptor [Source:NCBI gene;Acc:109616909]	2	21456352
	tcf25	transcription factor 25 [Source:NCBI gene;Acc:105015951]	2	21465448
	mvda	mevalonate diphosphate decarboxylase [Source:NCBI gene;Acc:105015965]	2	21495912
	pdcd5	programmed cell death 5 [Source:NCBI gene;Acc:105015973]	2	21505423
	kif7	kinesin family member 7 [Source:NCBI gene;Acc:105016040]	2	21709669
	gps1	G protein pathway suppressor 1 [Source:NCBI gene;Acc:105005746]	5	19077754
	tnnt1	troponin T1, slow skeletal type [Source:HGNC Symbol;Acc:HGNC:11948]	5	26397181
	si:ch211-200p22.4	si:ch211-200p22.4 [Source:ZFIN;Acc:ZDB-GENE-081104-61]	7	43751238
	tpi1a	triosephosphate isomerase A [Source:NCBI gene;Acc:105025848]	10	21255210
	eno2	enolase 2 [Source:ZFIN;Acc:ZDB-GENE-040704-27]	10	21262997
	iffo1a	intermediate filament family orphan 1 [Source:NCBI gene;Acc:105025856]	10	21416314
	fam131ba	protein FAM131B [Source:NCBI gene;Acc:105025860]	10	21485401
	clcn1a	chloride channel protein 1 [Source:NCBI gene;Acc:105025861]	10	21511159
	styk1a	tyrosine-protein kinase STYK1-like [Source:NCBI gene;Acc:105025862]	10	21541620
	si:dkey-14o18.2	neuronal pentraxin-1 [Source:NCBI gene;Acc:105025869]	10	21593358
	cacng7a	voltage-dependent calcium channel gamma-7 subunit [Source:NCBI gene;Acc:105025872]	10	21661003
	grin2da	glutamate receptor, ionotropic, N-methyl D-aspartate 2D, a [Source:ZFIN;Acc:ZDB-GENE-041008-124]	10	21706325
	dbpa	hepatic leukemia factor [Source:NCBI gene;Acc:105025873]	10	21822620
	znf865	zinc finger protein 865 [Source:NCBI gene;Acc:105025874]	10	21837877
	shisa7b	protein shisa-7 [Source:NCBI gene;Acc:105025876]	10	21855866
	ccdc106b	coiled-coil domain-containing protein 106 [Source:NCBI gene;Acc:105025880]	10	21913339
	rcvrn3	visinin [Source:NCBI gene;Acc:105025881]	10	21923471
	zgc:194578	epsin-1 [Source:NCBI gene;Acc:105025884]	10	21942023
	necap1	adaptin ear-binding coat-associated protein 1 [Source:NCBI gene;Acc:105025883]	10	21952669
	si:ch211-171h4.3	serine/threonine-protein kinase SBK1-like [Source:NCBI gene;Acc:105025885]	10	21966407
	zgc:91910	zinc finger protein 706 [Source:NCBI gene;Acc:105012773]	10	22051463
	ndufs5	NADH:ubiquinone oxidoreductase subunit S5 [Source:ZFIN;Acc:ZDB-GENE-050522-437]	10	22269042
	rnf19b	ring finger protein 19B [Source:NCBI gene;Acc:105012769]	10	22273424
	ak2	adenylate kinase 2 [Source:NCBI gene;Acc:105012768]	10	22303997
	erf	ETS domain-containing transcription factor ERF [Source:NCBI gene;Acc:105029756]	10	20946197
	cica	protein capicua homolog [Source:NCBI gene;Acc:105029757]	10	20976101
	si:ch211-264f5.6	carcinoembryonic antigen-related cell adhesion molecule 5 [Source:NCBI gene;Acc:105029762]	10	21179002
	zgc:174904	CD209 antigen-like protein C [Source:NCBI gene;Acc:105029763]	10	21216535
	gnb3b	guanine nucleotide binding protein (G protein), beta polypeptide 3b [Source:ZFIN;Acc:ZDB-GENE-040426-2280]	10	21247761
	pih1d1	Esox lucius PIH1 domain containing 1 (pih1d1), mRNA. [Source:RefSeq mRNA;Acc:NM_001303772]	11	47167227
	rac3a	ras-related C3 botulinum toxin substrate 3 [Source:NCBI gene;Acc:105031329]	11	45969983
	gps1	COP9 signalosome complex subunit 1 [Source:NCBI gene;Acc:105031328]	11	45989763
	dus1l	dihydrouridine synthase 1 like [Source:NCBI gene;Acc:105031327]	11	46034488
	engase	endo-beta-N-acetylglucosaminidase [Source:NCBI gene;Acc:561239]	11	46124538
	scpep1	serine carboxypeptidase 1 [Source:ZFIN;Acc:ZDB-GENE-040426-890]	11	46142901
	coil	coilin [Source:NCBI gene;Acc:105031332]	11	46149330
	rab11fip4a	RAB11 family interacting protein 4 (class II) a [Source:NCBI gene;Acc:436806]	11	46155332
	suz12a	SUZ12 polycomb repressive complex 2 subunit a [Source:NCBI gene;Acc:794171]	11	46270894
	crlf3	cytokine receptor like factor 3 [Source:NCBI gene;Acc:105031640]	11	46292949
	zgc:193811	uncharacterized LOC105031633 [Source:NCBI gene;Acc:105031633]	11	46354404
	kcnc3a	potassium voltage-gated channel subfamily C member 1 [Source:NCBI gene;Acc:105031448]	11	46839157
	aldh16a1	aldehyde dehydrogenase 16 family member A1 [Source:NCBI gene;Acc:105031445]	11	46972616
	syt5a	synaptotagmin Va [Source:ZFIN;Acc:ZDB-GENE-040718-110]	11	47084496
	tnnt1	troponin T, slow skeletal muscle-like [Source:NCBI gene;Acc:114828652]	11	47140508
	tnnt1	troponin T type 1 (skeletal, slow) [Source:ZFIN;Acc:ZDB-GENE-080723-27]	11	47154905
	zmat4a	zinc finger matrin-type 4 [Source:NCBI gene;Acc:105029468]	13	14595518
	ppp3cca	serine/threonine-protein phosphatase 2B catalytic subunit gamma isoform [Source:NCBI gene;Acc:105006198]	13	14811278
	SUSD2	sushi domain-containing protein 2 [Source:NCBI gene;Acc:105014058]	13	32468508
	si:dkey-174n20.1	retinol dehydrogenase 11 [Source:NCBI gene;Acc:105014061]	13	32509350
	adam28	zinc metalloproteinase-disintegrin-like brevilysin H2a [Source:NCBI gene;Acc:105006197]	13	14849862
	abcb9	ATP binding cassette subfamily B member 9 [Source:NCBI gene;Acc:105029380]	13	14939794
	zgc:113436	zgc:113436 [Source:ZFIN;Acc:ZDB-GENE-050220-6]	13	14947738
	ogfod2	2-oxoglutarate and iron dependent oxygenase domain containing 2 [Source:NCBI gene;Acc:105029381]	13	14951752
	zgc:110329	tetraspanin-15-like [Source:NCBI gene;Acc:105029383]	13	14997626
	ncaph	non-SMC condensin I complex subunit H [Source:NCBI gene;Acc:105029386]	13	15096287
	vamp8	vesicle-associated membrane protein 8 [Source:NCBI gene;Acc:105029388]	13	15109089
	vamp5	vesicle-associated membrane protein 5 [Source:NCBI gene;Acc:105029389]	13	15119770
	rnf181	ring finger protein 181 [Source:NCBI gene;Acc:105029392]	13	15137943
	tmem150aa	transmembrane protein 150A [Source:NCBI gene;Acc:105029390]	13	15144739
	si:dkey-13n15.2	si:dkey-13n15.2 [Source:ZFIN;Acc:ZDB-GENE-060526-209]	13	32760976
	hs3st1l2	heparan sulfate glucosamine 3-O-sulfotransferase 1 [Source:NCBI gene;Acc:105007233]	13	32832305
	ckap2l	cytoskeleton associated protein 2-like [Source:ZFIN;Acc:ZDB-GENE-030131-6690]	13	32909468
	tmem167a	protein kish-A [Source:NCBI gene;Acc:105027580]	13	4773592
	suds3	SDS3 homolog, SIN3A corepressor complex component [Source:ZFIN;Acc:ZDB-GENE-040801-236]	13	31881889
	srrm4	serine/arginine repetitive matrix 4 [Source:NCBI gene;Acc:105014052]	13	32131527
	hspb8	heat shock protein family B (small) member 8 [Source:NCBI gene;Acc:105014053]	13	32194117
	si:dkey-1k23.3	heat shock protein 67B1-like [Source:NCBI gene;Acc:105014063]	13	32203021
	xbp1	X-box binding protein 1 [Source:ZFIN;Acc:ZDB-GENE-011210-2]	13	32261630
	znrf3	zinc and ring finger 3 [Source:NCBI gene;Acc:105014055]	13	32279764
	coq5	coenzyme Q5, methyltransferase [Source:NCBI gene;Acc:447802]	13	32357816
	kremen1	kringle containing transmembrane protein 1 [Source:NCBI gene;Acc:105014057]	13	32378796
	nsmfb	NMDA receptor synaptonuclear signaling and neuronal migration factor b [Source:NCBI gene;Acc:569891]	13	13636024
	tnc	tenascin C [Source:ZFIN;Acc:ZDB-GENE-980526-104]	13	13721844
	rabl6b	RAB, member RAS oncogene family-like 6b [Source:ZFIN;Acc:ZDB-GENE-081104-97]	13	13855474
	imp4	IMP U3 small nucleolar ribonucleoprotein 4 [Source:NCBI gene;Acc:105014390]	13	13872667
	araf	A-Raf proto-oncogene, serine/threonine kinase [Source:NCBI gene;Acc:105014388]	13	13877695
	cd53	Esox lucius CD53 molecule (cd53), mRNA. [Source:RefSeq mRNA;Acc:NM_001303920]	13	13891248
	lman2lb	Esox lucius VIP36-like protein (LOC105014385), mRNA. [Source:RefSeq mRNA;Acc:NM_001310946]	13	13900825
	tbx3b	T-box transcription factor 3b [Source:ZFIN;Acc:ZDB-GENE-060531-144]	13	13922180
	tm2d2	TM2 domain containing 2 [Source:NCBI gene;Acc:105014384]	13	13929121
	htra4	HtrA serine peptidase 4 [Source:NCBI gene;Acc:105014508]	13	13936558
	unc5db	unc-5 netrin receptor Db [Source:ZFIN;Acc:ZDB-GENE-060531-162]	13	14177692
	hdr	tumor necrosis factor receptor superfamily member 10B [Source:NCBI gene;Acc:105014382]	13	14384294
	loxl2b	lysyl oxidase-like 2b [Source:NCBI gene;Acc:791144]	13	14451358
	sfrp1a	secreted frizzled related protein 1 [Source:NCBI gene;Acc:105029461]	13	14548983
	tpst2	tyrosylprotein sulfotransferase 2 [Source:ZFIN;Acc:ZDB-GENE-040426-1400]	14	12679273
	npm2b	nucleoplasmin [Source:NCBI gene;Acc:105015223]	14	12726278
	grk3	G protein-coupled receptor kinase 3 [Source:ZFIN;Acc:ZDB-GENE-030616-382]	14	12771403
	crybb1	crystallin beta B1 [Source:NCBI gene;Acc:105015219]	14	12816361
	cryba4	crystallin beta A4 [Source:NCBI gene;Acc:105015220]	14	12828521
	acads	short-chain specific acyl-CoA dehydrogenase, mitochondrial [Source:NCBI gene;Acc:105015217]	14	12839465
	cldn5b	claudin-5 [Source:NCBI gene;Acc:105015216]	14	12853799
	sept5b	septin-5 [Source:NCBI gene;Acc:105015215]	14	12865111
	mctp1b	multiple C2 and transmembrane domain-containing protein 1 [Source:NCBI gene;Acc:105015213]	14	12873527
	arrdc3b	arrestin domain-containing protein 3-like [Source:NCBI gene;Acc:105015212]	14	12919031
	cetn3	centrin 3 [Source:NCBI gene;Acc:105015211]	14	12933123
	mef2ca	myocyte-specific enhancer factor 2C [Source:NCBI gene;Acc:105015210]	14	12943150
	edil3b	EGF-like repeat and discoidin I-like domain-containing protein 3 [Source:NCBI gene;Acc:105015209]	14	12970813
	hapln1b	hyaluronan and proteoglycan link protein 1 [Source:NCBI gene;Acc:105015207]	14	12992946
	xrcc4	DNA repair protein XRCC4 [Source:NCBI gene;Acc:105015205]	14	13034932
	tmem167a	transmembrane protein 167A [Source:NCBI gene;Acc:541340]	14	13060801
	atg10	autophagy related 10 [Source:NCBI gene;Acc:105015204]	14	13071986
	zcchc9	zinc finger CCHC-type containing 9 [Source:NCBI gene;Acc:105015203]	14	13078358
	wdr45	WD repeat domain 45 [Source:NCBI gene;Acc:105015201]	14	13167481
	stc1l	stanniocalcin [Source:NCBI gene;Acc:105015195]	14	13209562
	vamp8	Esox lucius vesicle-associated membrane protein 8 (vamp8), mRNA. [Source:RefSeq mRNA;Acc:NM_001303715]	14	28463532
	kctd9b	BTB/POZ domain-containing protein KCTD9-like [Source:NCBI gene;Acc:105015193]	14	13254875
	march5l	Esox lucius E3 ubiquitin-protein ligase MARCH5 (LOC105015192), mRNA. [Source:RefSeq mRNA;Acc:NM_001304007]	14	13263130
	actr1	beta-centractin [Source:NCBI gene;Acc:105015191]	14	13267128
	npy8ar	neuropeptide Y receptor Y8a [Source:ZFIN;Acc:ZDB-GENE-990415-175]	14	13288026
	dbnla	drebrin-like a [Source:ZFIN;Acc:ZDB-GENE-040704-42]	14	13356953
	dusp11	dual specificity phosphatase 11 [Source:NCBI gene;Acc:105015186]	14	13393664
	gfra2b	GDNF family receptor alpha-2 [Source:NCBI gene;Acc:105015273]	14	13491913
	tia1	nucleolysin TIA-1 [Source:NCBI gene;Acc:105015180]	14	13715490
	SUSD2	sushi domain-containing protein 2 [Source:NCBI gene;Acc:105014910]	14	24771485
	dtwd2	DTW domain containing 2 [Source:NCBI gene;Acc:105015179]	14	13727131
	dmgdh	dimethylglycine dehydrogenase [Source:NCBI gene;Acc:105015173]	14	13804868
	bhmt	betaine--homocysteine S-methyltransferase 1 [Source:NCBI gene;Acc:105015174]	14	13809649
	ARSB	arylsulfatase B [Source:NCBI gene;Acc:105015172]	14	13838108
	lhfpl2a	LHFPL tetraspan subfamily member 2 [Source:NCBI gene;Acc:105015171]	14	13895189
	scamp1	secretory carrier membrane protein 1 [Source:NCBI gene;Acc:105015170]	14	13908987
	ap3b1a	adaptor related protein complex 3 subunit beta 1 [Source:NCBI gene;Acc:105015169]	14	13926038
	tbca	tubulin cofactor a [Source:ZFIN;Acc:ZDB-GENE-040426-962]	14	14011610
	otpa	orthopedia homeobox [Source:NCBI gene;Acc:105015167]	14	14033649
	wdr41	WD repeat domain 41 [Source:NCBI gene;Acc:105015166]	14	14047594
	pde8b	phosphodiesterase 8B [Source:NCBI gene;Acc:105015165]	14	14065950
	aggf1	angiogenic factor with G-patch and FHA domains 1 [Source:NCBI gene;Acc:105015163]	14	14116920
	lcat	phosphatidylcholine-sterol acyltransferase [Source:NCBI gene;Acc:105030834]	16	12828542
	myorg	myogenesis regulating glycosidase (putative) [Source:NCBI gene;Acc:105017039]	17	15954746
	cita	citron rho-interacting serine/threonine kinase a [Source:ZFIN;Acc:ZDB-GENE-130530-981]	17	15996863
	rplp0	ribosomal protein lateral stalk subunit P0 [Source:NCBI gene;Acc:105017046]	17	16106951
	loxl2a	lysyl oxidase homolog 2A [Source:NCBI gene;Acc:105017050]	17	16131599
	tacc1	transforming acidic coiled-coil-containing protein 1 [Source:NCBI gene;Acc:105017051]	17	16173906
	si:dkey-81j8.6	serine/threonine-protein kinase 10 [Source:NCBI gene;Acc:105017101]	17	16234112
	tctn1	tectonic family member 1 [Source:NCBI gene;Acc:105017054]	17	16252679
	hvcn1	hydrogen voltage gated channel 1 [Source:NCBI gene;Acc:105017056]	17	16263631
	dnai1.2	dynein axonemal intermediate chain 1 [Source:NCBI gene;Acc:105017063]	17	16399694
	zgc:109965	zgc:109965 [Source:ZFIN;Acc:ZDB-GENE-050913-21]	17	16441226
	rem1	GTP-binding protein GEM [Source:NCBI gene;Acc:105017066]	17	16458735
	pnp4a	purine nucleoside phosphorylase [Source:NCBI gene;Acc:105017069]	17	16483744
	sox12	transcription factor SOX-12 [Source:NCBI gene;Acc:105017070]	17	16553539
	trib3	tribbles homolog 2 [Source:NCBI gene;Acc:105017071]	17	16631684
	rbck1	RanBP-type and C3HC4-type zinc finger containing 1 [Source:ZFIN;Acc:ZDB-GENE-040704-3]	17	16647533
	tbc1d20	TBC1 domain family member 20 [Source:NCBI gene;Acc:105017074]	17	16660325
	elmo2	engulfment and cell motility 2 [Source:NCBI gene;Acc:105017075]	17	16671462
	arfgap1	ADP ribosylation factor GTPase activating protein 1 [Source:NCBI gene;Acc:105017076]	17	16696223
	sys1	SYS1 golgi trafficking protein [Source:NCBI gene;Acc:105017081]	17	16744395
	dnajc14	DnaJ heat shock protein family (Hsp40) member C14 [Source:NCBI gene;Acc:105017084]	17	16772302
	nab2	NGFI-A binding protein 2 [Source:NCBI gene;Acc:105017083]	17	16786923
	dgkab	diacylglycerol kinase, alpha b [Source:ZFIN;Acc:ZDB-GENE-121105-5]	17	16872368
	cnpy2	Esox lucius canopy FGF signaling regulator 2 (cnpy2), mRNA. [Source:RefSeq mRNA;Acc:NM_001310848]	17	16975855
	syt6b	synaptotagmin-6 [Source:NCBI gene;Acc:105017096]	17	16993333
	olfml3b	olfactomedin like 3 [Source:NCBI gene;Acc:105017097]	17	17053849
	gpr25	G protein-coupled receptor 25 [Source:ZFIN;Acc:ZDB-GENE-141216-12]	17	17059831
	inavab	innate immunity activator protein [Source:NCBI gene;Acc:105017099]	17	17083273
	rnpep	arginyl aminopeptidase [Source:NCBI gene;Acc:105016934]	17	17116928
	adipor1a	adiponectin receptor 1 [Source:NCBI gene;Acc:105016936]	17	17137465
	rabif	RAB interacting factor [Source:NCBI gene;Acc:105016938]	17	17148604
	kdm5ba	lysine demethylase 5B [Source:NCBI gene;Acc:105016939]	17	17153154
	nelfcd	negative elongation factor complex member C/D [Source:ZFIN;Acc:ZDB-GENE-040426-720]	17	17180428
	ctsz	cathepsin Z [Source:NCBI gene;Acc:105016941]	17	17189571
	npepl1	aminopeptidase like 1 [Source:ZFIN;Acc:ZDB-GENE-050417-177]	17	17199992
	stx16	syntaxin 16 [Source:NCBI gene;Acc:105016943]	17	17212982
	eef1aktm3	EEF1A lysine methyltransferase 3 [Source:NCBI gene;Acc:105016945]	17	17224978
	jph3	junctophilin 3 [Source:NCBI gene;Acc:105018516]	19	29139454
	zcchc14	zinc finger, CCHC domain containing 14 [Source:ZFIN;Acc:ZDB-GENE-060503-319]	19	29185069
	map1lc3b	microtubule associated protein 1 light chain 3 beta [Source:NCBI gene;Acc:105018514]	19	29218410
	det1	DET1 partner of COP1 E3 ubiquitin ligase [Source:NCBI gene;Acc:105018512]	19	29268048
	ntrk3a	neurotrophic receptor tyrosine kinase 3 [Source:NCBI gene;Acc:105018511]	19	29443030
	sv2bb	synaptic vesicle glycoprotein 2Bb [Source:ZFIN;Acc:ZDB-GENE-030131-2789]	19	30057585
	lrp5	LDL receptor related protein 5 [Source:NCBI gene;Acc:105026612]	19	30179636
	si:ch211-194m7.5	olfactomedin-4-like [Source:NCBI gene;Acc:105018536]	19	28736461
	ndrg4	NDRG family member 4 [Source:NCBI gene;Acc:105018537]	19	28742122
	gins3	GINS complex subunit 3 [Source:NCBI gene;Acc:105018534]	19	28778304
	znrf1	zinc and ring finger 1 [Source:NCBI gene;Acc:105018533]	19	28786181
	ldhd	lactate dehydrogenase D [Source:NCBI gene;Acc:105018532]	19	28831333
	snrkb	SNF-related serine/threonine-protein kinase-like [Source:NCBI gene;Acc:105018531]	19	28843839
	fa2h	fatty acid 2-hydroxylase [Source:NCBI gene;Acc:105018529]	19	28941701
	csnk2a2b	casein kinase 2 alpha 2 [Source:NCBI gene;Acc:105018528]	19	28982909
	ccdc113	coiled-coil domain containing 113 [Source:NCBI gene;Acc:450041]	19	28994241
	znf319b	zinc finger protein 319 [Source:NCBI gene;Acc:105018524]	19	29004131
	usb1	U6 snRNA biogenesis 1 [Source:NCBI gene;Acc:445066]	19	29008033
	pla2g15	phospholipase A2, group XV [Source:ZFIN;Acc:ZDB-GENE-030131-6948]	19	29012261
	lcat	lecithin-cholesterol acyltransferase [Source:NCBI gene;Acc:105018521]	19	29023833
	ccdc135	coiled-coil domain containing 135 [Source:ZFIN;Acc:ZDB-GENE-120406-10]	19	29037870
	uba2	ubiquitin-like modifier activating enzyme 2 [Source:NCBI gene;Acc:406672]	19	29051472
	ca5a	carbonic anhydrase 5A [Source:NCBI gene;Acc:105018519]	19	29063629
	slc7a5	solute carrier family 7 member 5 [Source:NCBI gene;Acc:105018518]	19	29084358
	klhdc4	kelch domain containing 4 [Source:NCBI gene;Acc:105018517]	19	29118673
	ENO2	gamma-enolase [Source:NCBI gene;Acc:105029963]	20	19856249
	rps4x	Esox lucius ribosomal protein S4 X-linked (rps4x), mRNA. [Source:RefSeq mRNA;Acc:NM_001303937]	24	24953275
	wrap53	WD repeat containing antisense to TP53 [Source:NCBI gene;Acc:105029892]	24	15760834
	col4a5	collagen type IV alpha 5 chain [Source:NCBI gene;Acc:105030863]	24	24527008
	gc2	retinal guanylyl cyclase 2 [Source:NCBI gene;Acc:105030861]	24	24662726
	znf16l	zinc finger protein 16 like [Source:NCBI gene;Acc:570544]	24	8195050
	sstr1b	somatostatin receptor 1b [Source:ZFIN;Acc:ZDB-GENE-120410-2]	24	8309391
	cd248a	CD248 molecule, endosialin a [Source:ZFIN;Acc:ZDB-GENE-030131-2084]	24	8331259
	peli3	E3 ubiquitin-protein ligase pellino homolog 1 [Source:NCBI gene;Acc:105022127]	24	8374597
	rce1a	Ras converting CAAX endopeptidase 1 [Source:NCBI gene;Acc:105022128]	24	8381130
	eml3	EMAP like 3 [Source:NCBI gene;Acc:105020715]	24	8414974
	rasl11a	RAS like family 11 member A [Source:NCBI gene;Acc:105030860]	24	24711603
	usp12b	ubiquitin carboxyl-terminal hydrolase 12 [Source:NCBI gene;Acc:105030858]	24	24718343
	arhgap36	rho GTPase-activating protein 6 [Source:NCBI gene;Acc:105030857]	24	24736469
	nhsl2	NHS like 2 [Source:NCBI gene;Acc:105028219]	24	24853978
	hdac8	histone deacetylase 8 [Source:NCBI gene;Acc:105028222]	24	24964713
	dock11	dedicator of cytokinesis 11 [Source:ZFIN;Acc:ZDB-GENE-060503-196]	24	14194794
	vbp1	VHL binding protein 1 [Source:NCBI gene;Acc:105028223]	24	25031254
	zgc:162171	ras-related protein Rab-38 [Source:NCBI gene;Acc:105028225]	24	25053393
	si:ch211-200p22.4	si:ch211-200p22.4 [Source:ZFIN;Acc:ZDB-GENE-081104-61]	24	25098211
	si:dkey-172j4.3	diacylglycerol kinase delta [Source:NCBI gene;Acc:105028228]	24	25167330
	gpr185b	G-protein coupled receptor 12 [Source:NCBI gene;Acc:105007680]	24	25319992
	zgc:109889	zgc:109889 [Source:ZFIN;Acc:ZDB-GENE-050522-547]	24	25408858
	htr2cl1	5-hydroxytryptamine receptor 2C [Source:NCBI gene;Acc:105007309]	24	25454353
	hdac8	phosphorylase b kinase regulatory subunit alpha, skeletal muscle isoform [Source:NCBI gene;Acc:105007262]	24	26395602
	taf6l	TATA-box binding protein associated factor 6 like [Source:NCBI gene;Acc:105020720]	24	8486156
	cth1	mRNA decay activator protein ZFP36L2 [Source:NCBI gene;Acc:105020718]	24	8492385
	mta2	metastasis associated 1 family, member 2 [Source:ZFIN;Acc:ZDB-GENE-030131-4803]	24	8495823
	fxr2	fragile X mental retardation syndrome-related protein 1 [Source:NCBI gene;Acc:105020589]	24	14755843
	ecsit	ECSIT signaling integrator [Source:NCBI gene;Acc:105020716]	24	8550095
	si:dkey-106g10.7	si:dkey-106g10.7 [Source:ZFIN;Acc:ZDB-GENE-160728-46]	24	8566692
	men1	menin 1 [Source:NCBI gene;Acc:105020713]	24	8596192
	map4k2	mitogen-activated protein kinase kinase kinase kinase 2 [Source:NCBI gene;Acc:105020711]	24	8602587
	rbm4.2	RNA-binding protein 4.1 [Source:NCBI gene;Acc:105020710]	24	8619117
	rbm4.1	RNA-binding protein 4.1-like [Source:NCBI gene;Acc:114828645]	24	8624727
	sf1	splicing factor 1 [Source:ZFIN;Acc:ZDB-GENE-030131-2492]	24	8628962
	alpk1	Esox lucius ependymin-like (LOC105020702), mRNA. [Source:RefSeq mRNA;Acc:NM_001303716]	24	8666402
	si:dkey-165a24.9	si:dkey-165a24.9 [Source:ZFIN;Acc:ZDB-GENE-141209-1]	24	14789470
	ugt5g1	UDP glucuronosyltransferase 5 family, polypeptide G1 [Source:ZFIN;Acc:ZDB-GENE-080305-10]	24	14794693
	cldn7a	claudin-7-A [Source:NCBI gene;Acc:105020582]	24	14856508
	chrnb1l	acetylcholine receptor subunit beta [Source:NCBI gene;Acc:105020580]	24	14869669
	chrnb1	acetylcholine receptor subunit beta-like [Source:NCBI gene;Acc:105020605]	24	14901074
	fgf11a	fibroblast growth factor 11 [Source:NCBI gene;Acc:105020579]	24	14936411
	tmem102	protein MB21D2 [Source:NCBI gene;Acc:105020578]	24	15046074
	si:dkey-85k7.12	si:dkey-85k7.12 [Source:ZFIN;Acc:ZDB-GENE-130530-855]	24	15268690
	si:dkey-85k7.11	si:dkey-85k7.11 [Source:ZFIN;Acc:ZDB-GENE-160728-145]	24	15671460
	ufsp1	ufm1-specific protease 1 [Source:NCBI gene;Acc:105029896]	24	15692241
	epoa	erythropoietin [Source:NCBI gene;Acc:105029895]	24	15704265
	pop7	POP7 homolog, ribonuclease P/MRP subunit [Source:NCBI gene;Acc:105029893]	24	15714788
	drap1	DR1 associated protein 1 [Source:NCBI gene;Acc:105020695]	24	9547508
	rela	putative transcription factor p65 homolog [Source:NCBI gene;Acc:105020694]	24	9555721
